# Supplementary material
Source: PubMed Central journal article supplement (PMC4527030)
Supplement: CJN.10181014_CJN10181014SupplementaryData.pdf [file CJN.10181014_CJN10181014SupplementaryData.pdf]

# Suppl Fig. 1, Murakami et al.

(A)

|                   | Total population | In survey   |     |
|-------------------|------------------|-------------|-----|
| Early dialysis    | 524 (63.9%)      | 221 (61.9%) |     |
|                   |                  | missed      | 57  |
|                   |                  | not missed  | 164 |
| No early dialysis | 296 (36.1%)      | 136 (38.1%) |     |
|                   |                  | missed      | 37  |
|                   |                  | not missed  | 99  |
| Total (patients)  | 820              | 357         |     |

(B)

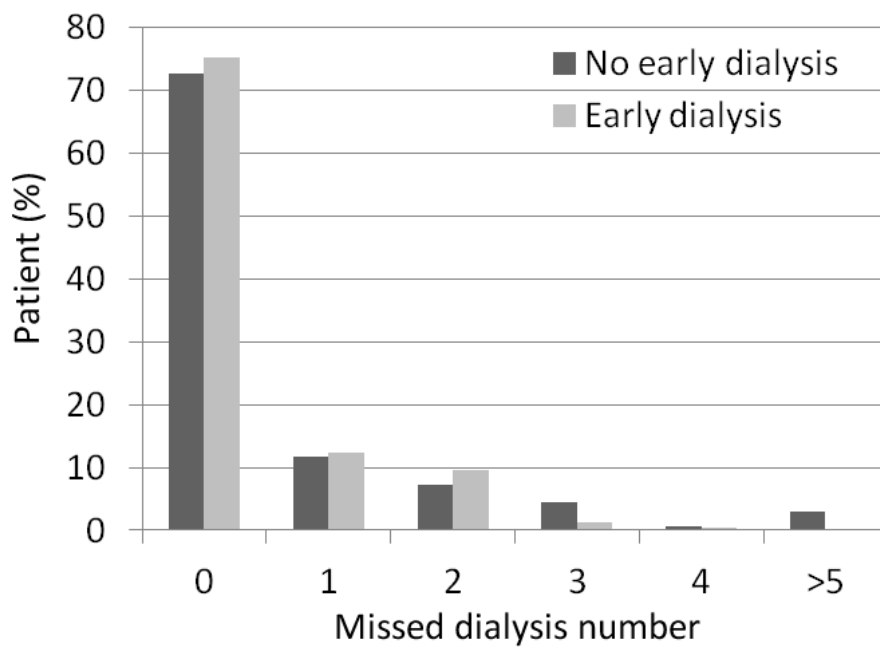

*Supplemental Figure 1: Effect of early dialysis on missed dialysis sessions.*

- (A) The participant numbers and percentage of those who received early dialysis prior to the landfall of Hurricane Sandy. Early dialysis did not change the proportion of participants that missed dialysis. ( $p=0.81$ , Fisher's exact test).
- (B) Histogram of missed dialysis session numbers. In the early dialysis group, the percentages of participants who missed 0, 1, or 2 dialyses increased and those of 3 or more decreased.

*Supplemental Table: Tabular tables for Fisher's or chi square test.*

Tabular tables describing the participant numbers on: cache of medical record and distribution of emergency packet (A), knowledge of backup dialysis center and distribution of emergency packet (B), non-English speaker and missed dialysis (C), visual impairment and missed dialysis (D).

(A)

|                        |     | Emergency packet |     |     |
|------------------------|-----|------------------|-----|-----|
|                        |     | Yes              | No  |     |
| Medical record at home | Yes | 159              | 70  | 229 |
|                        | No  | 37               | 91  | 128 |
|                        |     | 196              | 161 | 357 |

(B)

|                              |     | Emergency packet |     |     |
|------------------------------|-----|------------------|-----|-----|
|                              |     | Yes              | No  |     |
| Knowledge of dialysis center | Yes | 132              | 103 | 235 |
|                              | No  | 64               | 58  | 122 |
|                              |     | 196              | 161 | 357 |

(C)

|                    |     | Missed dialysis |     |     |
|--------------------|-----|-----------------|-----|-----|
|                    |     | Yes             | No  |     |
| Understand English | Yes | 83              | 183 | 266 |
|                    | No  | 11              | 80  | 91  |
|                    |     | 94              | 263 | 357 |

(D)

|                   |     | Yes | No  |     |
|-------------------|-----|-----|-----|-----|
| Visual impairment | Yes | 6   | 21  | 27  |
|                   | No  | 88  | 242 | 330 |
|                   |     | 94  | 263 | 357 |
